# Supplementary material for: Two Species with an Unusual Combination of Traits Dominate Responses of British Grasshoppers and Crickets to Environmental Change
Source: PLOS journal article supplement (doi:10.1371/journal.pone.0130488), 2015-06-25
Supplement: S3 (10.1371/journal.pone.0130488.s003) [file journal.pone.0130488.s003]

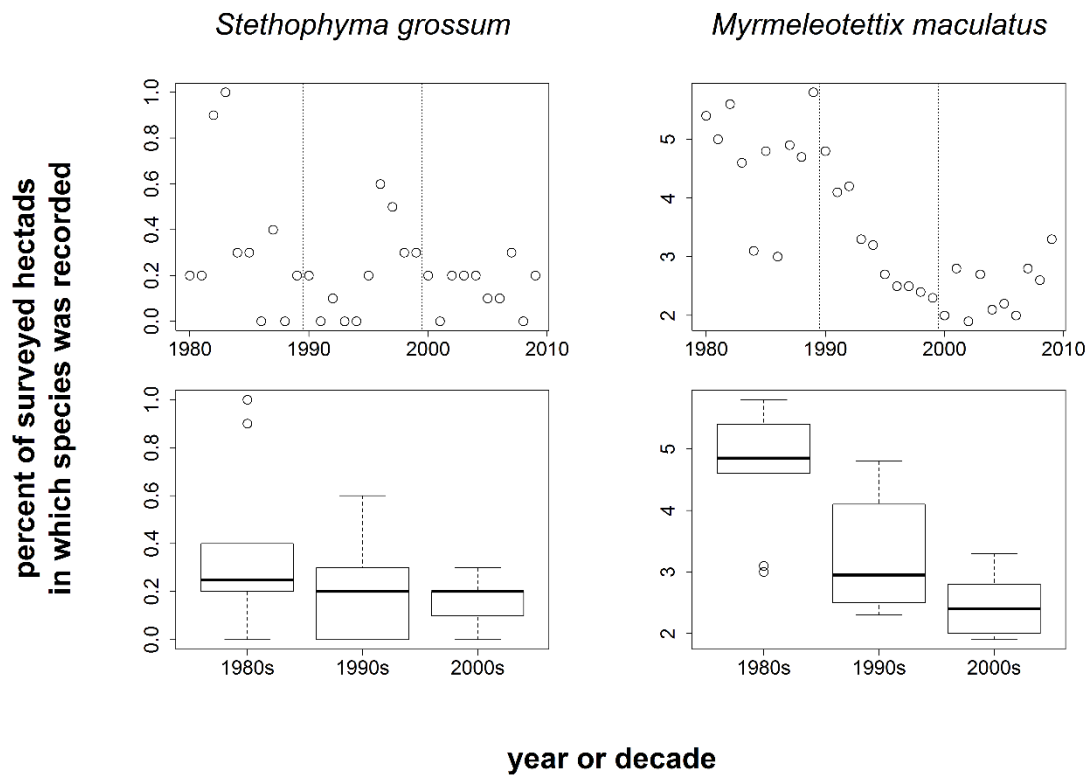

**S3 Fig. Scatter- and boxplots of annual relative numbers of hectad records for species with the greatest negative range changes.** To account for changes in overall recording effort, annual numbers of hectads in which a species was recorded were calculated as a percentage of the total number of hectads surveyed in the respective year.
