# Supplementary material for: Two Species with an Unusual Combination of Traits Dominate Responses of British Grasshoppers and Crickets to Environmental Change
Source: PLOS journal article supplement (doi:10.1371/journal.pone.0130488), 2015-06-25
Supplement: S6 (10.1371/journal.pone.0130488.s006) [file journal.pone.0130488.s006]

**S3 Table. Results of Shapiro-Wilk tests for normality of residuals.**

|                                                                                | range change measure | recording effort level | test statistic W |        |       | p-value |        |       | % of p-values $\geq 0.05$ |
|--------------------------------------------------------------------------------|----------------------|------------------------|------------------|--------|-------|---------|--------|-------|---------------------------|
|                                                                                |                      |                        | min              | median | max   | min     | median | max   |                           |
| models with <u>all species</u>                                                 | “uncorrected”        | 1                      | 0.906            | 0.957  | 0.974 | 0.033   | 0.405  | 0.790 | 98                        |
|                                                                                |                      | 2                      | 0.929            | 0.961  | 0.982 | 0.104   | 0.480  | 0.935 | 100                       |
|                                                                                |                      | 3                      | 0.918            | 0.962  | 0.985 | 0.060   | 0.506  | 0.974 | 100                       |
|                                                                                |                      | 4                      | 0.932            | 0.968  | 0.985 | 0.122   | 0.631  | 0.975 | 100                       |
|                                                                                | “corrected”          | 1                      | 0.913            | 0.958  | 0.974 | 0.048   | 0.418  | 0.789 | 98                        |
|                                                                                |                      | 2                      | 0.921            | 0.961  | 0.977 | 0.069   | 0.488  | 0.844 | 100                       |
|                                                                                |                      | 3                      | 0.919            | 0.960  | 0.983 | 0.063   | 0.468  | 0.945 | 100                       |
|                                                                                |                      | 4                      | 0.936            | 0.960  | 0.980 | 0.147   | 0.454  | 0.911 | 100                       |
| models with species <u>excluding <i>C. discolor</i> and <i>M. roeselii</i></u> | “uncorrected”        | 1                      | 0.855            | 0.924  | 0.977 | 0.005   | 0.104  | 0.871 | 81                        |
|                                                                                |                      | 2                      | 0.881            | 0.949  | 0.978 | 0.016   | 0.327  | 0.890 | 96                        |
|                                                                                |                      | 3                      | 0.907            | 0.944  | 0.978 | 0.048   | 0.266  | 0.897 | 98                        |
|                                                                                |                      | 4                      | 0.938            | 0.967  | 0.987 | 0.195   | 0.671  | 0.988 | 100                       |
|                                                                                | “corrected”          | 1                      | 0.863            | 0.924  | 0.978 | 0.007   | 0.104  | 0.896 | 91                        |
|                                                                                |                      | 2                      | 0.895            | 0.955  | 0.978 | 0.028   | 0.420  | 0.889 | 98                        |
|                                                                                |                      | 3                      | 0.909            | 0.949  | 0.980 | 0.053   | 0.320  | 0.921 | 100                       |
|                                                                                |                      | 4                      | 0.942            | 0.971  | 0.991 | 0.239   | 0.764  | 0.998 | 100                       |

Minima, medians and maxima of Shapiro-Wilk test statistic W and associated p-values, testing for normality of residuals of top GLM model sets with  $\Delta AIC < 4$  for two range change measures and four levels of recording effort. Results for models with all species (top half of table) and models with species excluding *Conocephalus discolor* and *Metriopectera roeselii* (bottom half).
