# Supplementary material for: Two Species with an Unusual Combination of Traits Dominate Responses of British Grasshoppers and Crickets to Environmental Change
Source: PLOS journal article supplement (doi:10.1371/journal.pone.0130488), 2015-06-25
Supplement: S10 (10.1371/journal.pone.0130488.s010) [file journal.pone.0130488.s010]

**S7 Table. Impacts of species traits on distribution changes of British grasshoppers and crickets (*excluding Conocephalus discolor* and *Metrioptera roeselii*) between the 1980s and 2000s, phylogenetic models.**

| trait                           |                                     | “uncorrected range change” |                           |                              |              | “corrected range change” |                           |                              |              |
|---------------------------------|-------------------------------------|----------------------------|---------------------------|------------------------------|--------------|--------------------------|---------------------------|------------------------------|--------------|
|                                 |                                     | % included                 | weighted mean coefficient | weighted mean standard error | significance | % included               | weighted mean coefficient | weighted mean standard error | significance |
| (Intercept)                     |                                     | 100                        | 0.98                      | 3.12                         | n.s.         | 100                      | 3.71                      | 8.94                         | n.s.         |
| habitat and resource use        | (i) breadth of habitat use          | 50                         | 0.38                      | 0.30                         | n.s.         | 47                       | 0.97                      | 0.88                         | n.s.         |
|                                 | (ii) vegetation structure:          | 3                          |                           |                              |              | 5                        |                           |                              |              |
|                                 | short vs. medium                    |                            | -0.13                     | 0.24                         | n.s.         |                          | -0.31                     | 0.73                         | n.s.         |
|                                 | short vs. tall                      |                            | -0.01                     | 0.30                         | n.s.         |                          | 0.16                      | 0.93                         | n.s.         |
|                                 | medium vs. tall                     |                            | 0.12                      | 0.25                         | n.s.         |                          | 0.46                      | 0.71                         | n.s.         |
|                                 | (iii) oviposition site:             | 24                         |                           |                              |              | 22                       |                           |                              |              |
|                                 | vegetation vs. ground               |                            | 0.24                      | 0.24                         | n.s.         |                          | 0.56                      | 0.73                         | n.s.         |
|                                 | vegetation vs. ground or vegetation |                            | 0.04                      | 0.26                         | n.s.         |                          | -0.01                     | 0.79                         | n.s.         |
|                                 | ground vs. ground or vegetation     |                            | -0.20                     | 0.18                         | n.s.         |                          | -0.57                     | 0.51                         | n.s.         |
|                                 | (iv) diet:                          | 20                         |                           |                              |              | 18                       |                           |                              |              |
| herbivorous vs. not herbivorous |                                     | -0.03                      | 0.19                      | n.s.                         |              | -0.06                    | 0.53                      | n.s.                         |              |
| life history                    | (v) mean body size                  | 59                         | -1.06                     | 0.72                         | n.s.         | 67                       | -3.24                     | 2.08                         | n.s.         |
|                                 | (vi) generations per year:          | 2                          |                           |                              |              | 4                        |                           |                              |              |
|                                 | one vs. half                        |                            | 0.02                      | 0.24                         | n.s.         |                          | 0.17                      | 0.70                         | n.s.         |
|                                 | one vs. half or one                 |                            | 0.04                      | 0.27                         | n.s.         |                          | 0.29                      | 0.80                         | n.s.         |
|                                 | half vs. half or one                |                            | 0.02                      | 0.34                         | n.s.         |                          | 0.12                      | 0.94                         | n.s.         |
|                                 | (vii) winter stage:                 | 32                         |                           |                              |              | 33                       |                           |                              |              |
|                                 | egg vs. not egg                     |                            | -0.21                     | 0.36                         | n.s.         |                          | -0.68                     | 1.04                         | n.s.         |
| dispersal ability               | (viii) phenology                    | 38                         | 0.12                      | 0.11                         | n.s.         | 42                       | 0.38                      | 0.31                         | n.s.         |
|                                 | (ix) wing morph:                    | 15                         |                           |                              |              | 8                        |                           |                              |              |
|                                 | short vs. long                      |                            | 0.18                      | 0.28                         | n.s.         |                          | 0.43                      | 0.74                         | n.s.         |
|                                 | short vs. dimorphic                 |                            | -0.07                     | 0.31                         | n.s.         |                          | -0.17                     | 0.77                         | n.s.         |
|                                 | long vs. dimorphic                  |                            | -0.25                     | 0.20                         | n.s.         |                          | -0.60                     | 0.58                         | n.s.         |
| distribution                    | (x) wing load                       | 18                         | -0.03                     | 0.17                         | n.s.         | 18                       | -0.05                     | 0.45                         | n.s.         |
|                                 | (xi) average latitude               | 25                         | -0.05                     | 0.23                         | n.s.         | 24                       | -0.21                     | 0.64                         | n.s.         |

Summary of results for sets of top PGLS models with  $\Delta AIC < 4$  (95 models for “uncorrected range change”, and 79 models for “corrected range change”). The importance of traits is indicated by the frequency with which they are included in the top model set (% included), and by their weighted mean coefficients, standard errors and significance levels. Results given are for minimum adequate recording effort, i.e. for “surveyed squares” with a minimum of 1 species recorded in both 1980-9 and 2000-9.
